# Supplementary material for: Hematopoietic stem and progenitor cells in adhesive microcavities
Source: Royal Society of Chemistry journal article supplement (doi:10.1039/b903711j), 2009-01-01
Supplement: b903711j.pdf [file b903711j.pdf]

## Supplementary Material

Kurth, I. et al. 'Hematopoietic Stem and Progenitor Cells in Adhesive Microcavities'

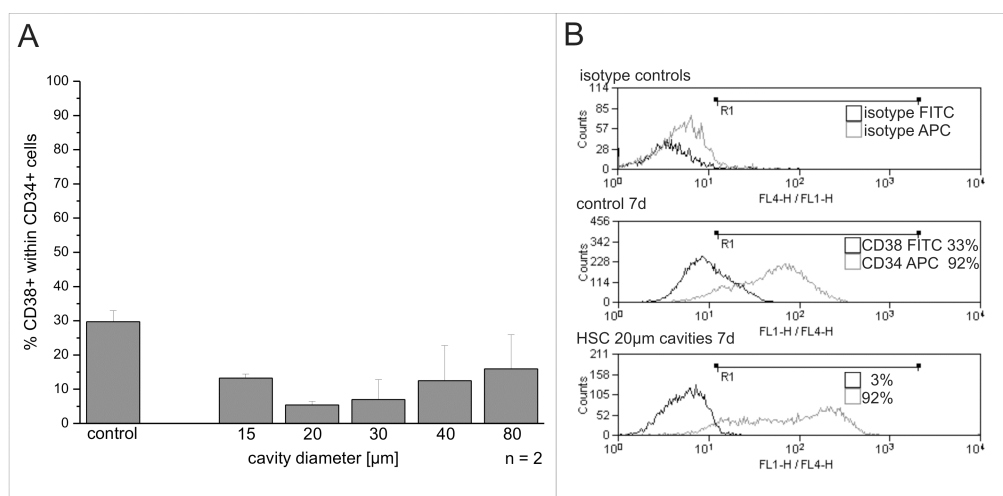

**Suppl. Fig. 1** CD38 surface expression within CD34 positive cells. (A) After 7 days the percentage of CD38 positive HSCs is reduced on microstructured substrates compared to control cells grown in suspension. (B) Representative histograms of FACS analysis show only 3% CD38+ cells on 20 μm cavities compared with 33% CD38+ HSCs in suspension. Data are presented as mean + SEM.

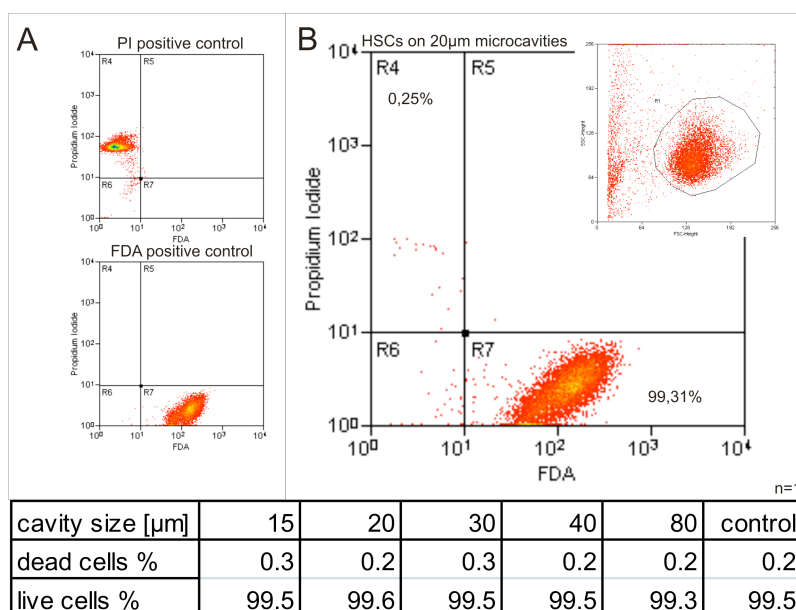

**Suppl. Fig. 2** Live/Dead staining for HSCs after 7 days in culture on microstructured substrates. (A) Positive controls for propidium iodide (PI) and fluorescein diacetate (FDA) staining. (B) Representative FACS plot shows more than 99% viable cells within the gated region for HSCs. The table below presents the percentages of live and dead cells for the different sized microcavities.
